# Supplementary material for: Detection of free DNA based on metal-enhanced fluorescence triggered by CRISPR-Cas12a and colorimetric analysis
Source: Royal Society of Chemistry journal article supplement (doi:10.1039/d4ay00149d), 2024-01-01
Supplement: d4ay00149d1.pdf [file d4ay00149d1.pdf]

## Supplementary Information

### Detection of Free DNA Based on Metal-Enhanced Fluorescence

### Triggered by CRISPR-Cas12a and Colorimetric Analysis

*Mingqiu Zheng<sup>1, a</sup>, Yuyao Li<sup>1, a</sup>, Liling Zhang<sup>a</sup>, Chengyu Li<sup>b</sup>, Menghan Liu<sup>a</sup>, Hongwu*

*Tang<sup>a\*</sup>*

*<sup>1</sup>These authors contributed equally: Mingqiu Zheng, Yuyao Li*

*<sup>a</sup>College of Chemistry and Molecular Sciences, Wuhan University, Wuhan, 430072,*

*People's Republic of China*

*<sup>b</sup>Hubei Province Key Laboratory of Occupational Hazard Identification and Control,*

*School of Public Health, Medical College, Wuhan University of Science and*

*Technology, Wuhan, 430065, People's Republic of China*

## Supplementary figure legends

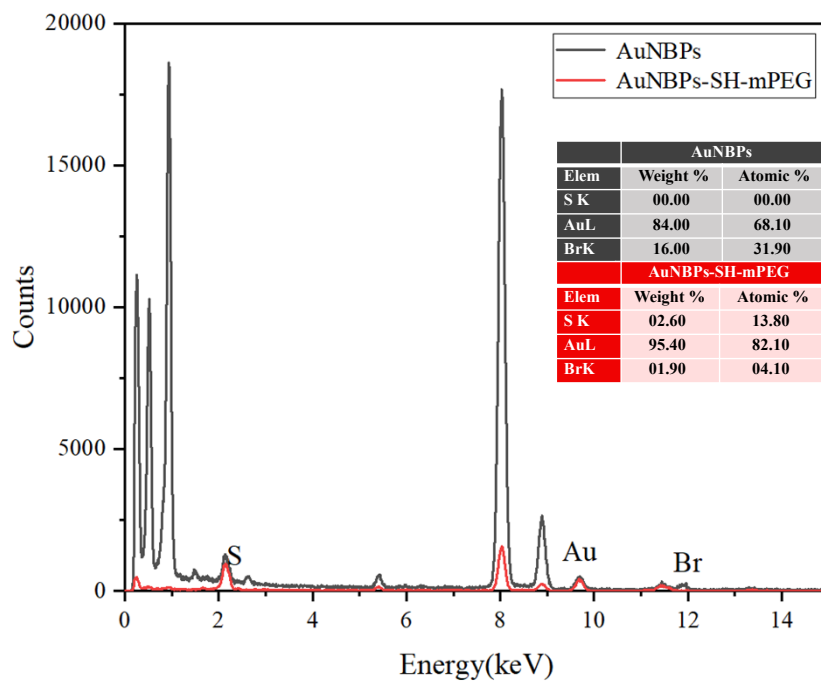

Figure S1 Energy Dispersive Spectroscopy (EDS) Analysis of Au, Br and S Elements of AuNBPs and AuNBPs-SH-mPEG.
